# Supplementary material for: Industry mobility and disability benefits in heavy manual jobs: A cohort study of Swedish construction workers
Source: PubMed Central journal article supplement (PMC8126441; doi:10.5271/sjweh.3932), 2021-03-31
Supplement: SJWEH-47-217-S001.pdf [file SJWEH-47-217-S001.pdf]

# Industry mobility and disability benefits in heavy manual jobs: A cohort study of Swedish construction workers <sup>1</sup>

by Mia Söderberg, PhD,<sup>2</sup> Mikael Stattin, PhD, Suzan JW Robroek, PhD, Alex Burdorf, PhD, Bengt Järvholm, PhD

1. *Supplementary material*

2. *Correspondence to: Mia Söderberg, Occupational and Environmental Medicine, School of Public Health and Community Medicine, Institute of Medicine, University of Gothenburg, Sweden. [E-mail: mia.soderberg@amm.gu.se]*

**Appendix 1a.** Characteristics of the sub-cohort by 45 years of age at evaluated industry, at the 1<sup>st</sup> examination and at follow-up

| Age cohort | At first clinical examination          |                          |              |                                         |                                       |                                     |                  |                    | At follow-up at 60-64 years of age   |                                                 |
|------------|----------------------------------------|--------------------------|--------------|-----------------------------------------|---------------------------------------|-------------------------------------|------------------|--------------------|--------------------------------------|-------------------------------------------------|
|            | Occupation at first health examination | In construction industry | N (%)        | Average age at first health examination | BMI >25 -29.9 kg/m <sup>2</sup> N (%) | BMI 30-34.9 kg/m <sup>2</sup> N (%) | Non-Smoker N (%) | Heavy-Smoker N (%) | Uncensored at 60 years of age, N (%) | Age when granted DP during follow-up, mean (sd) |
| 45 years   | <i>Concrete worker</i>                 | Yes                      | 5319 (52.5)  | 25.5 (5.7)                              | 1363 (25.6)                           | 160 (3.0)                           | 2390 (44.9)      | 920 (17.3)         | 2974 (55.9)                          | 61.6 (1.3)                                      |
|            |                                        | No                       | 4816 (47.5)  | 24.7 (5.4)                              | 1205 (25.0)                           | 175 (3.6)                           | 2206 (45.8)      | 932 (19.4)         | 3063 (63.6)                          | 61.5 (1.3)                                      |
|            | <i>Painter</i>                         | Yes                      | 6869 (64.6)  | 24.2 (4.9)                              | 1199 (17.5)                           | 118 (1.7)                           | 3456 (50.3)      | 891 (13.0)         | 3921 (57.1)                          | 61.6 (1.4)                                      |
|            |                                        | No                       | 3767 (35.4)  | 23.6 (4.8)                              | 712 (18.9)                            | 93 (2.5)                            | 1920 (51.0)      | 596 (15.8)         | 2408 (63.9)                          | 62.0 (1.6)                                      |
|            | <i>Drivers</i>                         | Yes                      | 3150 (50.3)  | 28.8 (6.0)                              | 1060 (33.7)                           | 185 (5.9)                           | 1199 (38.1)      | 637 (20.2)         | 1249 (39.7)                          | 61.8 (1.5)                                      |
|            |                                        | No                       | 3114 (49.7)  | 27.5 (5.6)                              | 979 (31.4)                            | 185 (5.9)                           | 1208 (38.8)      | 665 (21.4)         | 1394 (44.8)                          | 61.9 (1.4)                                      |
|            | <i>Electrician</i>                     | Yes                      | 11301 (53.0) | 24.6 (4.9)                              | 2104 (18.6)                           | 201 (1.8)                           | 7064 (62.5)      | 1028 (9.1)         | 6577 (58.2)                          | 61.7 (1.5)                                      |
|            |                                        | No                       | 10021 (47.0) | 24.2 (4.6)                              | 1872 (18.7)                           | 167 (1.7)                           | 6387 (63.7)      | 890 (8.9)          | 6113 (61.0)                          | 61.9 (1.8)                                      |
|            | <i>Foremen</i>                         | Yes                      | 5633 (55.1)  | 27.8 (5.4)                              | 1287 (22.9)                           | 100 (1.8)                           | 3087 (54.6)      | 721 (12.8)         | 1929 (34.2)                          | 62.0 (1.9)                                      |
|            |                                        | No                       | 4595 (44.9)  | 26.8 (5.1)                              | 944 (20.5)                            | 81 (1.8)                            | 2747 (59.8)      | 498 (10.8)         | 2079 (45.2)                          | 61.8 (1.6)                                      |

**Appendix 1b. Characteristics of the sub-cohort by 50 years of age at evaluated industry, at the 1<sup>st</sup> examination and at follow-up**

| Age cohort | At first clinical examination          |                          |              |                                         |                                      |                                     |                  |                    | At follow-up at 60-64 years of age   |                                |
|------------|----------------------------------------|--------------------------|--------------|-----------------------------------------|--------------------------------------|-------------------------------------|------------------|--------------------|--------------------------------------|--------------------------------|
|            | Occupation at first health examination | In construction industry | N (%)        | Average age at first health examination | BMI >25-29.9 kg/m <sup>2</sup> N (%) | BMI 30-34.9 kg/m <sup>2</sup> N (%) | Non-Smoker N (%) | Heavy-Smoker N (%) | Uncensored at 60 years of age, N (%) | Age when granted DP, mean (sd) |
| 50 years   | <i>Concrete worker</i>                 | Yes                      | 5939 (54.6)  | 27.9 (6.2)                              | 1668 (28.1)                          | 177 (3.0)                           | 2220 (37.4)      | 1085 (18.3)        | 2423 (40.8)                          | 62.0 (1.5)                     |
|            |                                        | No                       | 4939 (45.4)  | 27.1 (6.4)                              | 1373 (27.8)                          | 184 (3.7)                           | 1891 (38.3)      | 958 (19.4)         | 2309 (48.8)                          | 61.8 (1.5)                     |
|            | <i>Painter</i>                         | Yes                      | 6659 (65.4)  | 26.2 (5.8)                              | 1267 (19.0)                          | 131 (2.0)                           | 2963 (44.5)      | 896 (13.5)         | 2767 (41.6)                          | 62.0 (1.7)                     |
|            |                                        | No                       | 3525 (34.6)  | 25.7 (5.8)                              | 735 (20.9)                           | 81 (2.3)                            | 1513 (42.9)      | 557 (15.8)         | 1696 (48.1)                          | 61.9 (1.7)                     |
|            | <i>Drivers</i>                         | Yes                      | 4097 (51.5)  | 31.3 (6.6)                              | 1527 (37.3)                          | 266 (6.5)                           | 1385 (33.8)      | 769 (18.8)         | 1140 (27.8)                          | 62.1 (1.5)                     |
|            |                                        | No                       | 3861 (48.5)  | 29.6 (6.2)                              | 1288 (33.4)                          | 230 (6.0)                           | 1301 (33.7)      | 837 (21.7)         | 1201 (31.1)                          | 62.1 (1.7)                     |
|            | <i>Electrician</i>                     | Yes                      | 10086 (53.3) | 26.5 (5.7)                              | 2094 (20.8)                          | 193 (1.9)                           | 5414 (53.7)      | 1118 (11.1)        | 4307 (42.7)                          | 62.0 (1.8)                     |
|            |                                        | No                       | 8821 (46.7)  | 26.0 (5.5)                              | 1800 (20.3)                          | 168 (1.9)                           | 4910 (55.5)      | 1795 (10.4)        | 3982 (45.0)                          | 62.0 (1.6)                     |
|            | <i>Foremen</i>                         | Yes                      | 7184 (55.4)  | 30.2 (6.1)                              | 1885 (26.2)                          | 178 (2.5)                           | 3445 (48.0)      | 1057 (14.7)        | 1603 (22.3)                          | 62.2 (2.0)                     |
|            |                                        | No                       | 5789 (44.6)  | 28.9 (5.9)                              | 1361 (23.5)                          | 130 (2.3)                           | 2966 (51.2)      | 794 (13.7)         | 1750 (30.2)                          | 62.0 (2.0)                     |

**Appendix 1c. Characteristics of the sub-cohort by 55 years of age at evaluated industry, at the 1<sup>st</sup> examination and at follow-up**

| Age cohort | At first clinical examination          |                          |             |                                         |                                      |                                     |                  |                    | At follow-up at 60-64 years of age   |                                |
|------------|----------------------------------------|--------------------------|-------------|-----------------------------------------|--------------------------------------|-------------------------------------|------------------|--------------------|--------------------------------------|--------------------------------|
|            | Occupation at first health examination | In construction industry | N (%)       | Average age at first health examination | BMI >25-29.9 kg/m <sup>2</sup> N (%) | BMI 30-34.9 kg/m <sup>2</sup> N (%) | Non-Smoker N (%) | Heavy-Smoker N (%) | Uncensored at 60 years of age, N (%) | Age when granted DP, mean (sd) |
| 55 years   | <i>Concrete worker</i>                 | Yes                      | 5712 (56.7) | 31.0 (6.8)                              | 1780 (31.2)                          | 187 (3.2)                           | 1816 (31.2)      | 932 (16.3)         | 1831 (19.8)                          | 61.8 (1.4)                     |
|            |                                        | No                       | 4356 (43.3) | 29.9 (7.0)                              | 1279 (29.4)                          | 165 (3.8)                           | 1380 (31.7)      | 815 (18.7)         | 1016 (23.3)                          | 61.9 (1.1)                     |
|            | <i>Painter</i>                         | Yes                      | 5776 (66.8) | 28.4 (6.7)                              | 1161 (20.1)                          | 126 (2.2)                           | 2298 (39.8)      | 757 (12.6)         | 1323 (22.9)                          | 61.9 (1.6)                     |
|            |                                        | No                       | 2872 (33.2) | 27.9 (6.5)                              | 642 (22.4)                           | 61 (2.1)                            | 1102 (38.4)      | 421 (14.7)         | 736 (25.6)                           | 62.0 (1.8)                     |
|            | <i>Drivers</i>                         | Yes                      | 4337 (51.3) | 33.3 (7.2)                              | 1676 (38.6)                          | 264 (6.1)                           | 1354 (31.2)      | 757 (17.5)         | 654 (15.1)                           | 61.9 (1.0)                     |
|            |                                        | No                       | 4113 (48.7) | 31.7 (7.0)                              | 1488 (36.2)                          | 274 (6.7)                           | 1280 (31.1)      | 874 (20.6)         | 711 (17.3)                           | 62.1 (1.8)                     |
|            | <i>Electrician</i>                     | Yes                      | 8406 (53.9) | 28.6 (6.6)                              | 1854 (22.1)                          | 170 (2.0)                           | 3903 (46.4)      | 976 (11.6)         | 1890 (22.5)                          | 62.0 (1.7)                     |
|            |                                        | No                       | 7172 (46.0) | 27.7 (6.4)                              | 1568 (21.9)                          | 146 (2.0)                           | 3505 (48.9)      | 789 (11.0)         | 1787 (24.9)                          | 62.0 (1.6)                     |
|            | <i>Foremen</i>                         | Yes                      | 7505 (55.1) | 32.4 (6.8)                              | 2190 (25.5)                          | 210 (2.8)                           | 3275 (43.6)      | 1118 (14.9)        | 819 (10.9)                           | 62.0 (1.9)                     |
|            |                                        | No                       | 6126 (44.9) | 30.8 (6.6)                              | 1563 (25.5)                          | 167 (2.7)                           | 2798 (45.7)      | 930 (15.2)         | 927 (15.1)                           | 62.0 (1.9)                     |

**Appendix 2a.** New industries for worker evaluated at 45 years of age

| Occupation at first clinical examination        | Concrete workers |       | Painters |       | Drivers |       | Electricians |       | Foremen |       |
|-------------------------------------------------|------------------|-------|----------|-------|---------|-------|--------------|-------|---------|-------|
|                                                 | n                | %     | n        | %     | n       | %     | n            | %     | n       | %     |
| New industry                                    |                  |       |          |       |         |       |              |       |         |       |
| – Agriculture, forestry, fishery                | 182              | 3.78  | 83       | 2.20  | 239     | 7.68  | 138          | 1.38  | 71      | 1.55  |
| – Manufacturing                                 | 1358             | 28.20 | 794      | 21.08 | 733     | 23.54 | 2560         | 25.55 | 826     | 17.98 |
| – Energy production/Water supply/waste disposal | 151              | 3.14  | 44       | 1.17  | 108     | 3.47  | 1139         | 11.37 | 141     | 3.07  |
| – Trade/communication                           | 1133             | 23.53 | 795      | 21.10 | 1222    | 39.24 | 2261         | 22.56 | 790     | 17.19 |
| – Financial work                                | 961              | 19.95 | 1067     | 28.32 | 475     | 15.25 | 2394         | 23.89 | 1992    | 43.35 |
| – Education / Research                          | 246              | 5.11  | 251      | 6.66  | 80      | 2.57  | 465          | 4.64  | 145     | 3.16  |
| – Health and social work                        | 242              | 5.02  | 254      | 6.74  | 72      | 2.31  | 286          | 2.85  | 116     | 2.52  |
| – Culture work                                  | 317              | 6.58  | 296      | 7.86  | 94      | 3.02  | 405          | 4.04  | 126     | 2.74  |
| – Administration                                | 226              | 4.69  | 183      | 4.86  | 91      | 2.92  | 373          | 3.72  | 388     | 8.44  |
| Sum of workers who changed industries           | 4816             |       | 3767     |       | 3114    |       | 10 021       |       | 4595    |       |

**Appendix 2b.** New industries for worker evaluated at 50 years of age

| Occupation at first clinical examination        | Concrete workers |       | Painters |       | Drivers |       | Electricians |       | Foremen |       |
|-------------------------------------------------|------------------|-------|----------|-------|---------|-------|--------------|-------|---------|-------|
|                                                 | n                | %     | n        | %     | n       | %     | n            | %     | n       | %     |
| New industry                                    |                  |       |          |       |         |       |              |       |         |       |
| – Agriculture, forestry, fishery                | 221              | 4.47  | 89       | 2.52  | 270     | 6.99  | 131          | 1.48  | 115     | 1.99  |
| – Manufacturing                                 | 1334             | 27.01 | 657      | 18.64 | 888     | 23.00 | 2118         | 23.93 | 950     | 16.41 |
| – Energy production/Water supply/waste disposal | 148              | 3.00  | 36       | 1.02  | 154     | 3.99  | 1132         | 12.79 | 192     | 3.32  |
| – Trade/communication                           | 1068             | 21.62 | 662      | 18.78 | 1450    | 37.56 | 1835         | 20.73 | 954     | 16.48 |
| – Financial work                                | 1035             | 20.96 | 1097     | 31.12 | 608     | 15.75 | 2125         | 24.01 | 2537    | 43.82 |
| – Education / Research                          | 276              | 5.59  | 264      | 7.49  | 120     | 3.11  | 499          | 5.64  | 166     | 2.87  |
| – Health and social work                        | 244              | 4.94  | 267      | 7.57  | 102     | 2.64  | 291          | 3.29  | 139     | 2.40  |
| – Culture work                                  | 381              | 7.71  | 275      | 7.80  | 145     | 3.76  | 372          | 4.20  | 185     | 3.20  |
| – Administration                                | 232              | 4.70  | 178      | 5.05  | 124     | 3.21  | 348          | 3.93  | 551     | 9.52  |
| Sum of workers who changed industries           | 4939             |       | 3525     |       | 3861    |       | 8851         |       | 5789    |       |

**Appendix 2c.** New industries for worker evaluated at 55 years of age

| Occupation at first clinical examination        | Concrete workers |       | Painters |       | Drivers |       | Electricians |       | Foremen |       |
|-------------------------------------------------|------------------|-------|----------|-------|---------|-------|--------------|-------|---------|-------|
|                                                 | n                | %     | n        | %     | n       | %     | n            | %     | n       | %     |
| New industry                                    |                  |       |          |       |         |       |              |       |         |       |
| – Agriculture, forestry, fishery                | 191              | 4.38  | 84       | 2.92  | 254     | 6.18  | 122          | 1.70  | 114     | 1.86  |
| – Manufacturing                                 | 1131             | 25.96 | 501      | 17.44 | 947     | 23.02 | 1666         | 23.23 | 974     | 15.90 |
| – Energy production/Water supply/waste disposal | 135              | 3.10  | 24       | 0.84  | 174     | 4.23  | 1028         | 14.33 | 230     | 3.75  |
| – Trade/communication                           | 858              | 19.70 | 492      | 17.13 | 1461    | 35.52 | 1308         | 18.24 | 943     | 15.39 |
| – Financial work                                | 977              | 22.43 | 941      | 32.76 | 719     | 17.48 | 1784         | 24.87 | 2645    | 43.18 |
| – Education / Research                          | 235              | 5.39  | 216      | 7.52  | 135     | 3.28  | 414          | 5.77  | 168     | 2.74  |
| – Health and social work                        | 191              | 4.38  | 220      | 7.66  | 94      | 2.29  | 241          | 3.36  | 159     | 2.60  |
| – Culture work                                  | 388              | 8.91  | 235      | 8.18  | 199     | 4.84  | 327          | 4.56  | 239     | 3.90  |
| – Administration                                | 250              | 5.74  | 159      | 5.54  | 130     | 3.16  | 282          | 3.93  | 654     | 10.68 |
| Sum of workers who changed industries           | 4356             |       | 2872     |       | 4113    |       | 7172         |       | 6126    |       |
